# Supplementary material for: Impacts of Embryonic Thermal Programming on the Expression of Genes Involved in Foie gras Production in Mule Ducks
Source: PubMed Central journal article supplement (PMC8678469; doi:10.3389/fphys.2021.779689), 2021-12-03
Supplement: Table_3.pdf [file Table_3.pdf]

**Supplemental table 3.**

Informative table on the primers used for the reference genes

| <b>Gene name</b> | <b>Primer sequence</b>                             |
|------------------|----------------------------------------------------|
| Actine beta      | CCAGCCATCTTTCTTGGGTA<br>ATGCCTGGGTACATTGTGGT       |
| EIF3             | GATGAGGTGGCGGTGGATAT<br>TGGATTGGATTGTGCGCTTC       |
| HPRT1            | GTTGTGGGATACGCCCTAGA<br>ATGACAATGGGGGTGGATAA       |
| Luciferase       | CATTCTTCGCCAAAAGCACTCTG<br>AGCCCATATCCTTGTCGTATCCC |
| STAB1            | CCTTGAAACCCACAGAAAA<br>TACAGTCACCGCTGCTGAAG        |
| USP9X            | AGCCCTTTCAGCAACTGTC<br>CCAAGCCATTCTACTGCCCA        |
